# Supplementary material for: MoO42−-templated Ln20Ni21heterometallic clusters with large low-field magnetic entropy
Source: Royal Society of Chemistry journal article supplement (doi:10.1039/d3dt01811c), 2023-01-01
Supplement: d3dt01811c1.pdf [file d3dt01811c1.pdf]

## Supporting Information

### **MoO<sub>4</sub><sup>2-</sup>-templated Ln<sub>20</sub>Ni<sub>21</sub> heterometallic clusters with a large low-field magnetic entropy**

Ya-Ting Yu,<sup>a</sup> Xu Bai,<sup>a</sup> Qin Wang,<sup>a</sup> Ji-Lei Wang,<sup>a</sup> Xin-Ying Xiang,<sup>a</sup> Jiu-Lin Zhou,<sup>a</sup> Si-Man Li<sup>a</sup> and Yan Xu<sup>\*a,b</sup>

<sup>a</sup> College of Chemical Engineering, State Key Laboratory of Materials-Oriented Chemical Engineering, Nanjing Tech University, Nanjing 211800, P. R. China

<sup>b</sup> State Key Laboratory of Coordination Chemistry, School of Chemistry and Chemical Engineering, Nanjing University, Nanjing 210023, P. R. China

## Experimental Section

### Materials and methods

All materials, reagents, and solvents were of commercial origin and were used as received. Power X-ray diffraction data (PXRD) ( $2\theta = 3\text{-}50^\circ$ ) were collected by using Cu-K $\alpha$  ( $\lambda = 1.5418 \text{ \AA}$ ) radiation on a Bruker D8X diffractometer. Infrared spectra (FT-IR) of compounds were recorded with a Nicolet Impact 410 FTIR spectrometer with pressed KBr pellets, from 4000 to 400  $\text{cm}^{-1}$ . Thermogravimetric analysis (TGA) measurement was carried out with a STA409PC thermogravimetric analyzer in a flowing nitrogen atmosphere from 25 to 1000  $^\circ\text{C}$  with a heating rate of 10  $^\circ\text{C}\cdot\text{min}^{-1}$ . The direct current magnetic data were measured at temperatures between 1.8 and 300 K, and the magnetization isothermal measurements were made in fields of between 0 and 7 T on the MPMS-XL7 SQUID magnetometer. Experimental susceptibilities were corrected for the diamagnetism estimated in Pascal's tables and for the sample holder by the previous calibration.

### X-ray Crystallographic

Single crystals of compounds **1-3** were carefully selected under the microscope and mounted onto the tip of a thin glass fiber with epoxy glue for data collection. The single crystal X-ray diffraction of the compounds was tested through a Bruker Apex II CCD by using the  $\omega$ - $2\theta$  scan method with Mo-K $\alpha$  radiation ( $\lambda = 0.71073 \text{ \AA}$ ). The crystalline structures were settled by direct methods and refined by the full-matrix least-squares technique on  $F^2$  using the SHELX-2018/3 program package for compounds **Ln<sub>20</sub>Ni<sub>21</sub>**.

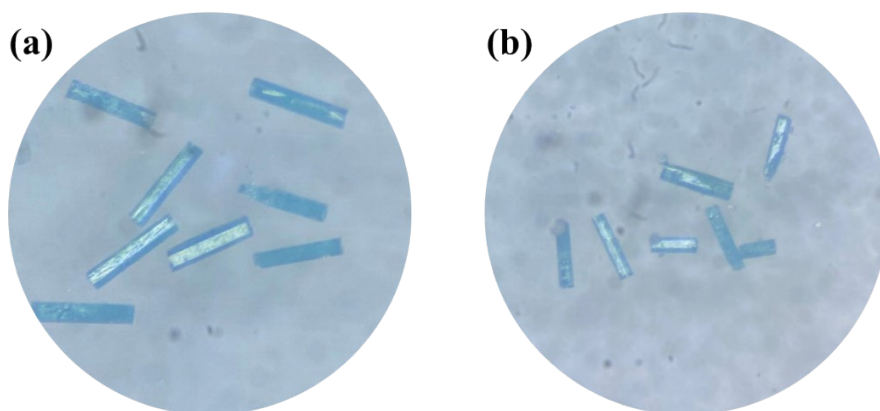

**Fig. S1** The images of compounds **1-2** under the optical microscope.

## Structure

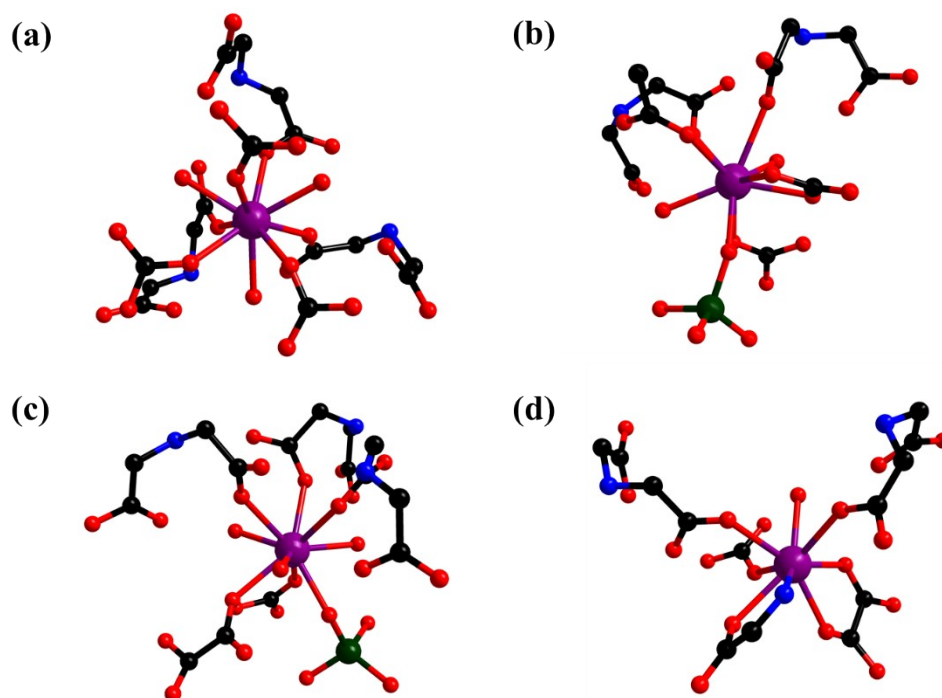

**Fig. S2** Ball-and-stick of coordination mode of Gd1(a), Gd2(b), Gd3(c), Gd4(d).

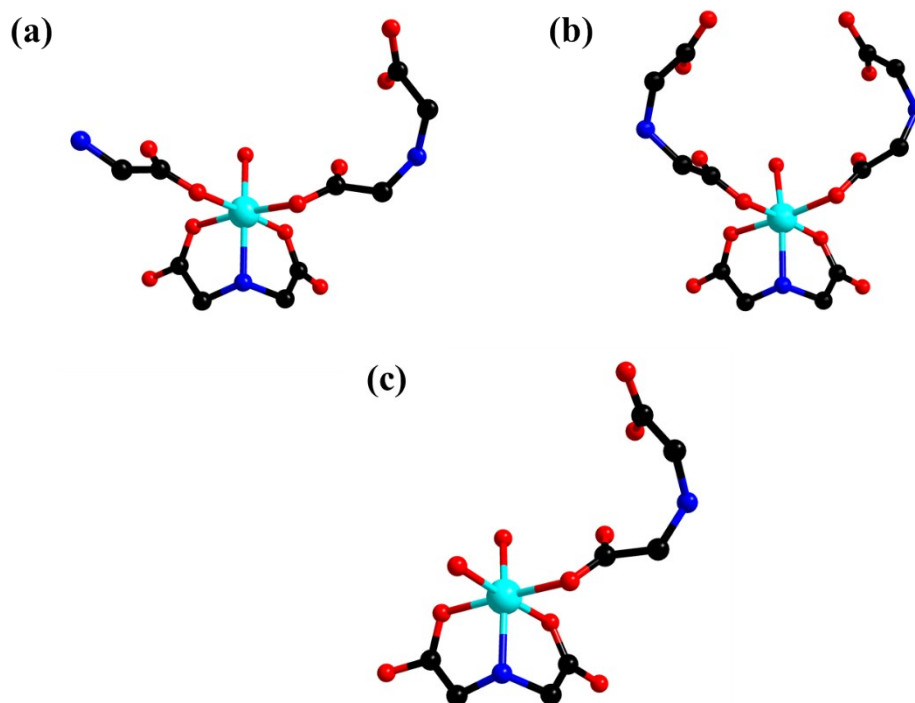

**Fig. S3** Ball-and-stick of coordination mode of Ni1(a), Ni2, Ni3(b), Ni4(c).

**Scheme S1.** Coordination Modes of H<sub>2</sub>IDA in compound **1**.

(a)

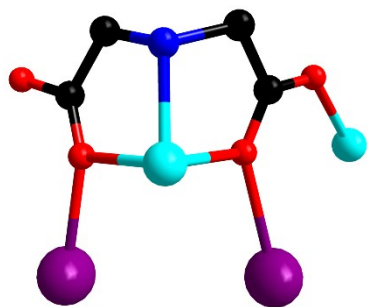

I

(b)

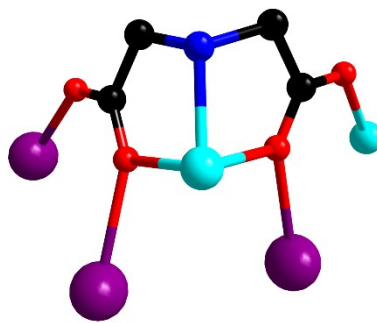

II

## EDS

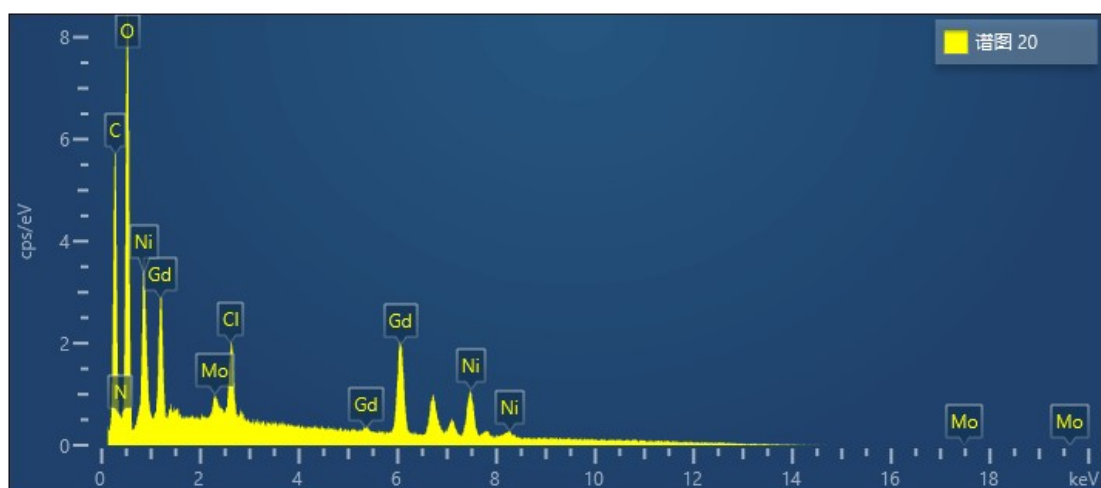

**Fig. S4** The EDS measurement of compound 1.

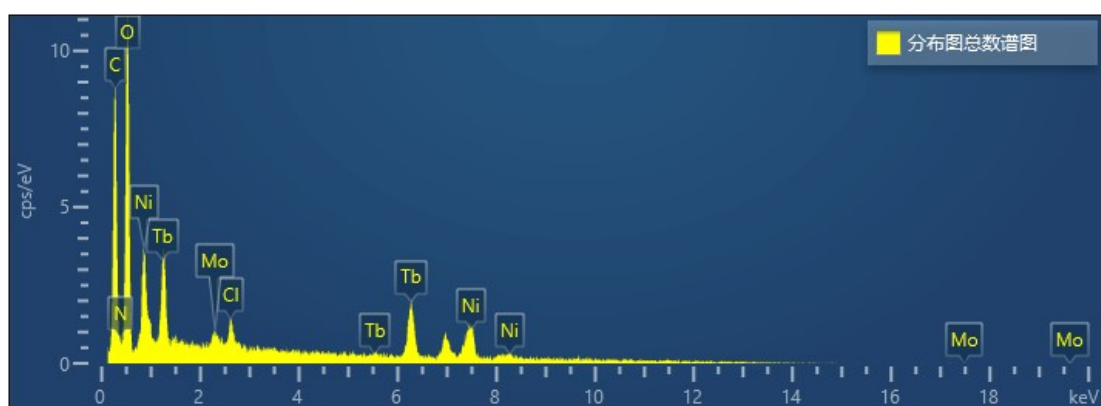

**Fig. S5** The EDS measurement of compound 2.

**Table S1.** The EDS results of compounds 1-2.

| Element | Percent by weight / % |       |
|---------|-----------------------|-------|
|         | 1                     | 2     |
| Cl      | 1.40                  | 0.57  |
| Mo      | 0.88                  | 0.70  |
| Ni      | 7.01                  | 6.20  |
| Gd/Tb   | 20.12                 | 16.71 |

## PXRD patterns

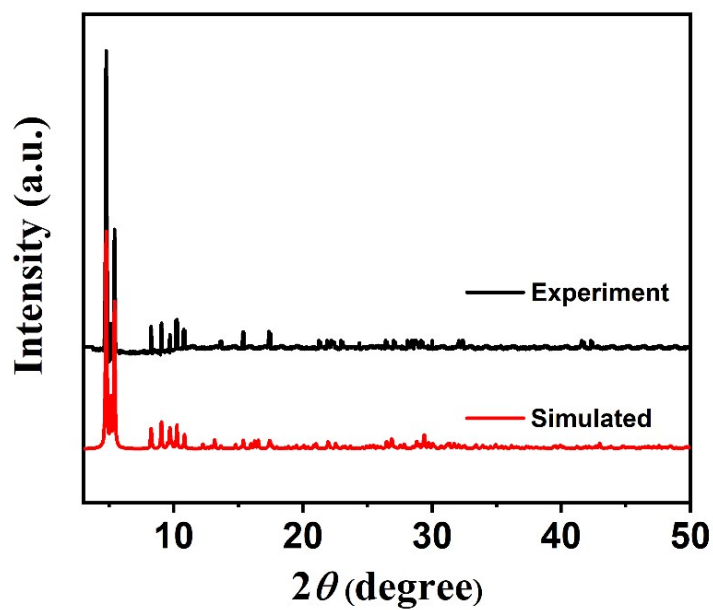

**Fig. S6** The PXRD spectrum of compound 1.

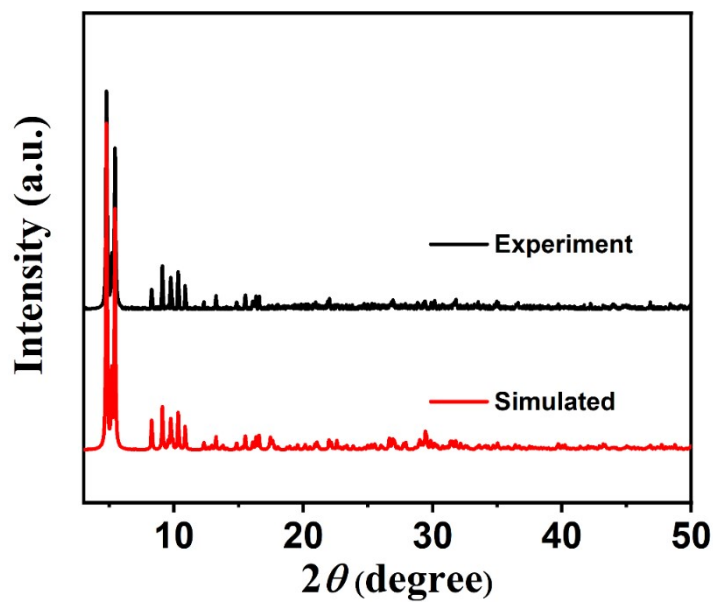

**Fig. S7** The PXRD spectrum of compound 2.

## FT-IR patterns

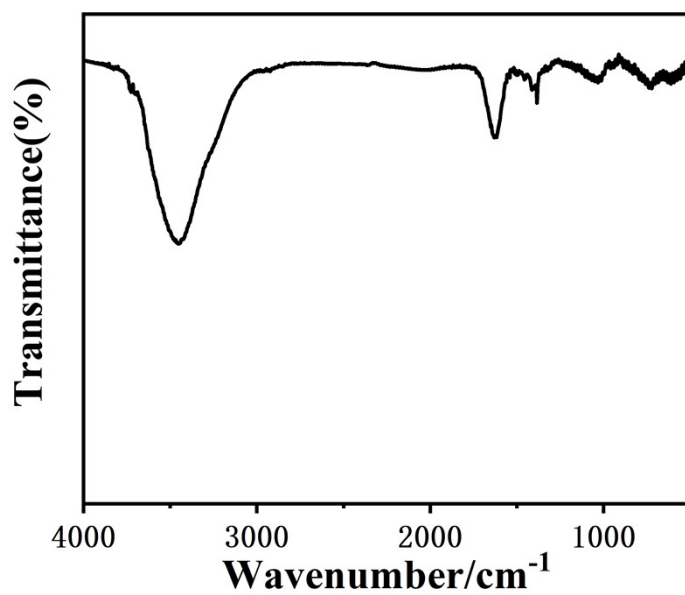

**Fig. S8** The IR spectrum of compound 1.

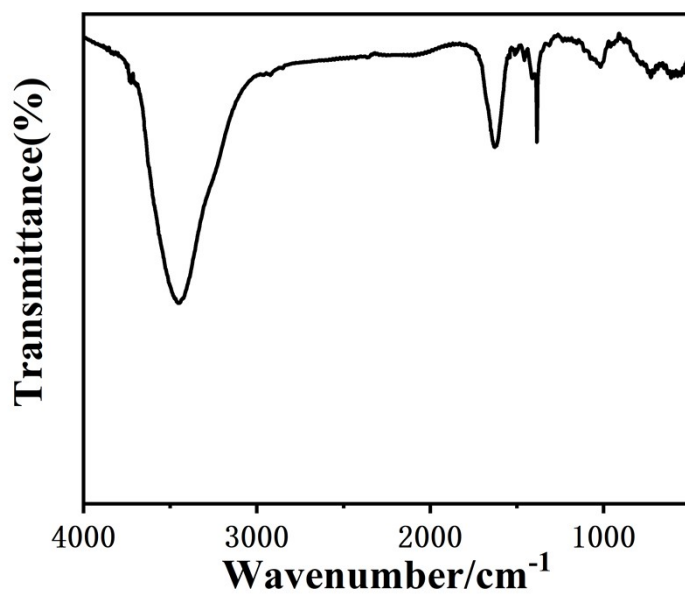

**Fig. S9** The IR spectrum of compound 2.

## TGA

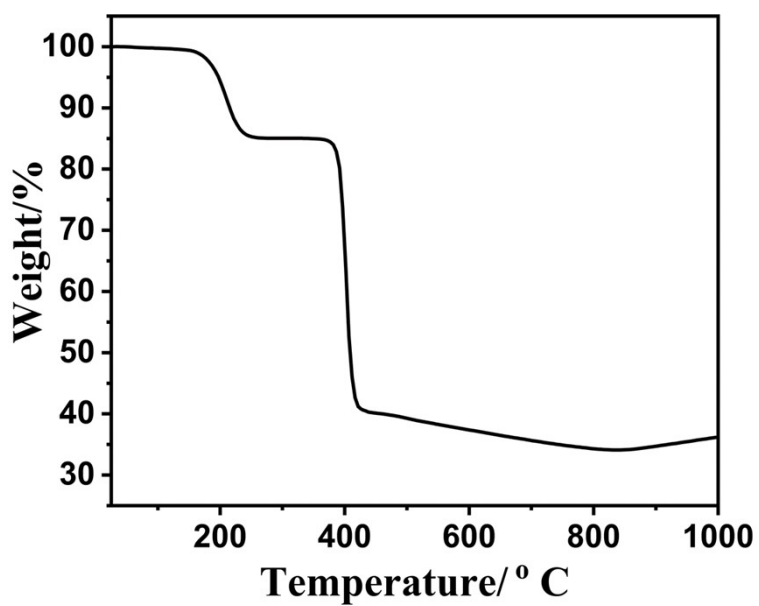

Fig. S10 TGA curve of compound 1.

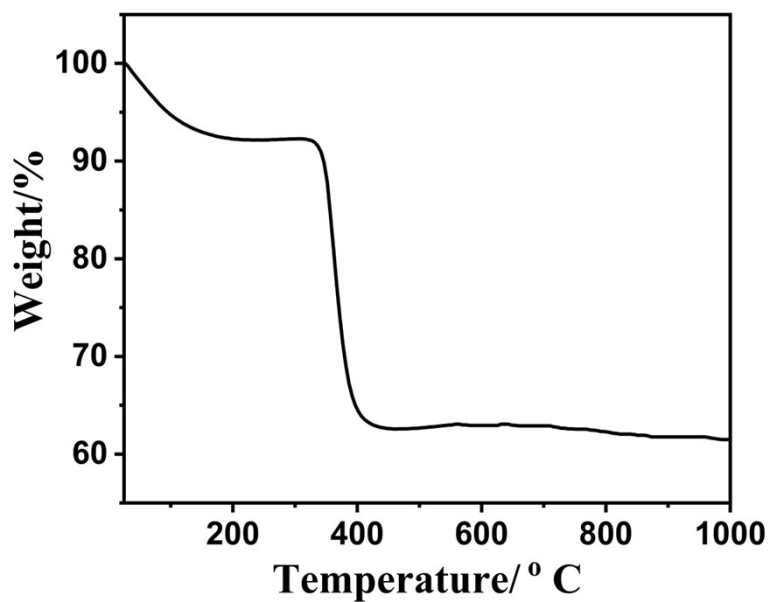

Fig. S11 TGA curve of compound 2.



## Magnetic property

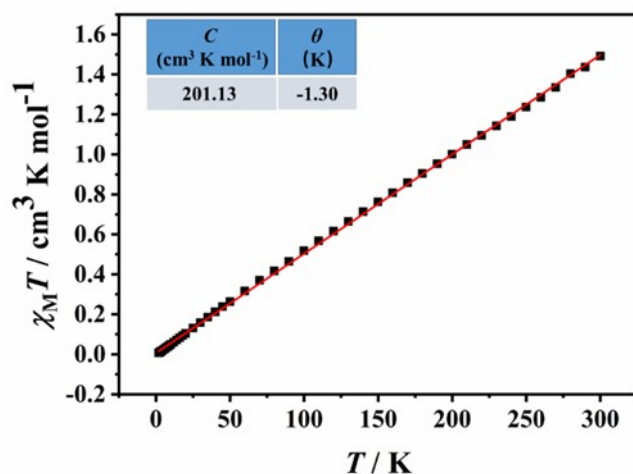

**Fig. S12**  $\chi_M^{-1}$  versus  $T$  plot of compound 1. The red line is the fitting result with  $\chi_M = C/(T - \theta)$ .

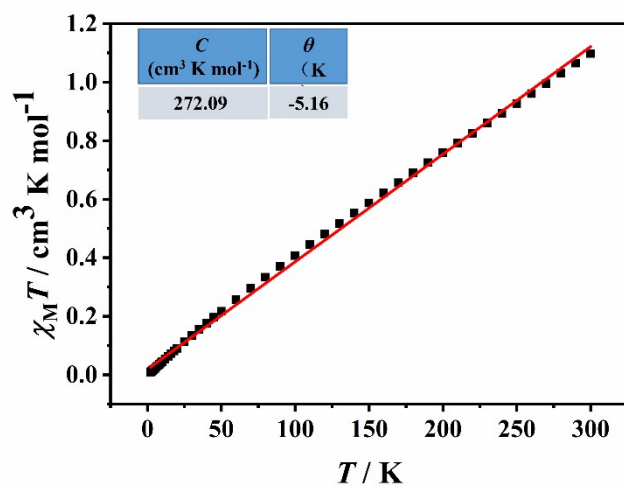

**Fig. S13**  $\chi_M^{-1}$  versus  $T$  plot of compound 2. The red line is the fitting result with  $\chi_M = C/(T - \theta)$ .

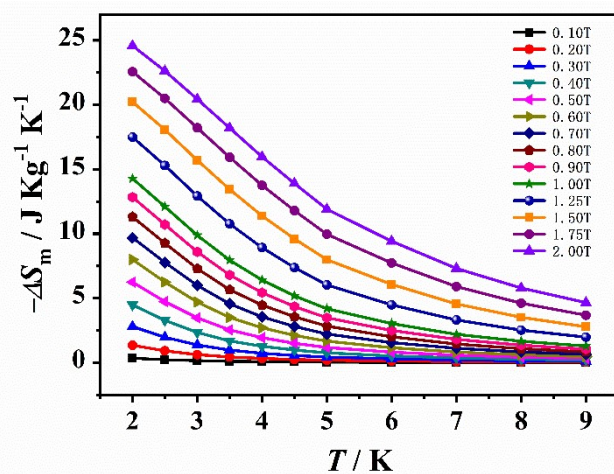

**Fig. S14** Values of  $-\Delta S_m$  calculated from the magnetization data for compound 1 in the low field.

**Table S2.** Selected Bond lengths (Å) for compound **1**.

|               |           |               |           |
|---------------|-----------|---------------|-----------|
| Gd(1)-O(8)#1  | 2.381(8)  | Gd(4)-N(4)    | 2.403(9)  |
| Gd(1)-O(8)    | 2.381(8)  | Gd(4)-O(22)#2 | 2.424(9)  |
| Gd(1)-O(8)#2  | 2.381(8)  | Gd(4)-O(29)   | 2.430(10) |
| Gd(1)-O(18)#1 | 2.407(9)  | Gd(4)-O(1A)   | 2.46(2)   |
| Gd(1)-O(18)#2 | 2.407(9)  | Gd(4)-O(28)   | 2.501(9)  |
| Gd(1)-O(18)   | 2.407(9)  | Gd(4)-O(1WA)  | 2.50(5)   |
| Gd(1)-O(13)   | 2.466(9)  | Gd(4)-O(15)   | 2.511(10) |
| Gd(1)-O(13)#1 | 2.466(8)  | Ni(1)-O(30)#1 | 2.021(10) |
| Gd(1)-O(13)#2 | 2.466(8)  | Ni(1)-O(2)    | 2.035(9)  |
| Gd(2)-O(18)#2 | 2.322(8)  | Ni(1)-O(5)    | 2.039(8)  |
| Gd(2)-O(26)#2 | 2.370(10) | Ni(1)-O(6)#2  | 2.049(10) |
| Gd(2)-O(5)#1  | 2.411(9)  | Ni(1)-O(14)   | 2.070(10) |
| Gd(2)-O(2)#1  | 2.457(8)  | Ni(1)-N(2)    | 2.086(9)  |
| Gd(2)-O(8)#2  | 2.467(9)  | Ni(2)-O(3)    | 2.006(10) |
| Gd(2)-O(12)#2 | 2.469(9)  | Ni(2)-O(13)#1 | 2.034(9)  |
| Gd(2)-O(15)   | 2.473(10) | Ni(2)-O(18)#1 | 2.043(8)  |
| Gd(2)-O(11)#1 | 2.586(9)  | Ni(2)-O(16)#1 | 2.049(9)  |
| Gd(2)-O(16)#2 | 2.636(9)  | Ni(2)-O(27)   | 2.078(10) |
| Gd(3)-O(10)   | 2.408(9)  | Ni(2)-N(1)#1  | 2.086(8)  |
| Gd(3)-O(4)    | 2.424(7)  | Ni(3)-O(4)    | 2.002(12) |
| Gd(3)-O(5)#2  | 2.436(9)  | Ni(3)-O(17)   | 2.062(10) |
| Gd(3)-O(25H)  | 2.461(9)  | Ni(3)-O(17)#3 | 2.062(10) |
| Gd(3)-O(25)   | 2.461(9)  | Ni(3)-O(9)#3  | 2.068(9)  |
| Gd(3)-O(9)    | 2.476(9)  | Ni(3)-O(9)    | 2.068(9)  |
| Gd(3)-O(28)   | 2.526(7)  | Ni(3)-N(5)    | 2.068(15) |
| Gd(3)-O(14)#2 | 2.527(8)  | Ni(4)-O(10)   | 2.030(9)  |
| Gd(3)-O(19)   | 2.535(9)  | Ni(4)-O(19)   | 2.044(10) |
| Gd(3)-O(11)#2 | 2.625(9)  | Ni(4)-N(3)    | 2.050(11) |
| Gd(4)-O(12)#2 | 2.301(9)  | Ni(4)-O(29)   | 2.072(12) |
| Gd(4)-O(1)    | 2.32(2)   | Ni(4)-O(24)#2 | 2.072(12) |
| Gd(4)-O(10)   | 2.390(9)  | Ni(4)-O(4W)   | 2.087(11) |

Symmetry transformations used to generate equivalent atoms:

#1 +y-x, 1-x, +z    #2 1-y, 1+x-y, +z    #3 +x, +y, 1/2-z

**Table S3.** Selected Bond lengths (Å) for compound **2**.

|               |           |               |           |
|---------------|-----------|---------------|-----------|
| Tb(1)-O(8)#1  | 2.371(19) | Tb(4)-O(10)   | 2.379(18) |
| Tb(1)-O(8)#2  | 2.371(19) | Tb(4)-N(4)    | 2.38(2)   |
| Tb(1)-O(8)    | 2.371(19) | Tb(4)-O(29)   | 2.41(3)   |
| Tb(1)-O(18)#1 | 2.389(19) | Tb(4)-O(15)   | 2.454(19) |
| Tb(1)-O(18)#2 | 2.389(19) | Tb(4)-O(28)   | 2.46(2)   |
| Tb(1)-O(18)   | 2.389(19) | Ni(1)-O(6)#2  | 2.03(3)   |
| Tb(1)-O(13)   | 2.463(18) | Ni(1)-O(2)    | 2.03(2)   |
| Tb(1)-O(13)#2 | 2.463(18) | Ni(1)-O(30)#1 | 2.04(2)   |
| Tb(1)-O(13)#1 | 2.463(18) | Ni(1)-O(5)    | 2.08(2)   |
| Tb(2)-O(18)#2 | 2.327(19) | Ni(1)-O(14)   | 2.10(2)   |
| Tb(2)-O(5)#1  | 2.345(19) | Ni(1)-N(2)    | 2.11(2)   |
| Tb(2)-O(26)#2 | 2.35(3)   | Ni(2)-O(3)    | 2.03(2)   |
| Tb(2)-O(15)   | 2.44(2)   | Ni(2)-O(18)#1 | 2.040(18) |
| Tb(2)-O(8)#2  | 2.45(2)   | Ni(2)-O(13)#1 | 2.053(18) |
| Tb(2)-O(2)#1  | 2.482(19) | Ni(2)-O(16)#1 | 2.06(2)   |
| Tb(2)-O(12)#2 | 2.48(2)   | Ni(2)-O(27)   | 2.06(2)   |
| Tb(2)-O(11)#1 | 2.567(18) | Ni(2)-N(1)#1  | 2.11(2)   |
| Tb(2)-O(16)#2 | 2.63(2)   | Ni(3)-O(4)    | 2.01(3)   |
| Tb(3)-O(25)   | 2.362(19) | Ni(3)-O(17)   | 2.05(2)   |
| Tb(3)-O(10)   | 2.415(18) | Ni(3)-O(17)#3 | 2.05(2)   |
| Tb(3)-O(4)    | 2.420(19) | Ni(3)-O(9)#3  | 2.070(19) |
| Tb(3)-O(5)#2  | 2.45(2)   | Ni(3)-O(9)    | 2.070(19) |
| Tb(3)-O(14)#2 | 2.49(2)   | Ni(3)-N(5)    | 2.07(4)   |
| Tb(3)-O(9)    | 2.490(18) | Ni(4)-O(19)   | 2.02(3)   |
| Tb(3)-O(28)   | 2.531(18) | Ni(4)-N(3)    | 2.03(3)   |
| Tb(3)-O(19)   | 2.54(2)   | Ni(4)-O(10)   | 2.039(19) |
| Tb(3)-O(11)#2 | 2.67(2)   | Ni(4)-O(29)   | 2.06(3)   |
| Tb(4)-O(12)#2 | 2.27(2)   | Ni(4)-O(24)#2 | 2.06(2)   |
| Tb(4)-O(1)    | 2.29(2)   | Ni(4)-O(4W)   | 2.11(3)   |
| Tb(4)-O(22)#2 | 2.38(2)   |               |           |

Symmetry transformations used to generate equivalent atoms:

#1 -y-1, x-y-1, z    #2 -x+y, -x-1, z    #3 x, y, -z-1/2

**Table S4.** Continuous Shape Measures Calculations for metal centers in compound 1.

| Metal Centers       | Coordination Number | Geometries                                                                          | SHAPE calculations result with the distortion values |                              |                                            |                                |                                     |
|---------------------|---------------------|-------------------------------------------------------------------------------------|------------------------------------------------------|------------------------------|--------------------------------------------|--------------------------------|-------------------------------------|
|                     |                     |                                                                                     | Enneagon                                             | Octagonal pyramid            | Heptagonal bipyramid                       | Johnson triangular cupola J3   | Capped cube J8                      |
| Gd1/<br>Gd2/<br>Gd3 | 9                   | 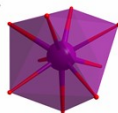   | 38.613/<br>38.964/<br>36.442                         | 21.798/<br>33.355/<br>22.165 | 21.615/<br>31.312/<br>20.844               | 16.903/<br>26.749/<br>14.529   | 11.612/<br>26.723/<br>11.203        |
|                     |                     |                                                                                     | Spherical-relaxed capped cube                        | Capped square antiprism J10  | Spherical capped square antiprism          | Tricapped trigonal prism J51   | Spherical tricapped trigonal prism  |
|                     |                     |                                                                                     | 10.147/<br>26.905/<br>9.891                          | 2.289/<br>21.756/<br>2.213   | 1.0579/<br>21.252/<br>1.031                | 2.416/<br>21.886/<br>2.675     | <b>0.123/<br/>21.204/<br/>0.736</b> |
|                     |                     |                                                                                     | Tridiminished icosahedron J63                        | Hula-hoop                    | Muffin                                     |                                |                                     |
|                     |                     |                                                                                     | 11.560/<br>29.428/<br>12.292                         | 13.529/<br>27.183/<br>11.731 | 1.826/<br>21.207/<br>1.570                 |                                |                                     |
|                     |                     |                                                                                     | Octagon                                              | Heptagonal pyramid           | Hexagonal bipyramid                        | Cube                           | Square antiprism                    |
| Gd4                 | 8                   |  | 28.306                                               | 21.727                       | 15.052                                     | 13.279                         | 3.958                               |
|                     |                     |                                                                                     | Triangular dodecahedron                              | Johnson gyrobifastigium J26  | Johnson elongated triangular bipyramid J14 | Biaugmented trigonal prism J50 | Biaugmented trigonal prism          |
|                     |                     |                                                                                     | <b>1.621</b>                                         | 11.523                       | 26.811                                     | 2.685                          | 1.876                               |
|                     |                     |                                                                                     | Snub diphenooid J84                                  | Triakis tetrahedron          | Elongated trigonal bipyramid               |                                |                                     |
|                     |                     |                                                                                     | 2.803                                                | 13.792                       | 23.547                                     |                                |                                     |

**Table S5.**  $-\Delta S_m$  ( $> 30 \text{ J kg}^{-1} \text{ K}^{-1}$ ) for reported Gd-based polymetallic clusters

| Complex                                                                | $-\Delta S_m$<br>( $\text{J kg}^{-1} \text{ K}^{-1}$ ) | T<br>(K)   | $\Delta H$<br>(T) | Ref.             |
|------------------------------------------------------------------------|--------------------------------------------------------|------------|-------------------|------------------|
| [Gd <sub>30</sub> Ni <sub>12</sub> ]                                   | 44.70                                                  | 2.0        | 7.0               | 1                |
| [Gd <sub>96</sub> Ni <sub>64</sub> ]                                   | 42.80                                                  | 3.0        | 7.0               | 2                |
| [Gd <sub>22</sub> Ni <sub>21</sub> ]                                   | 41.90                                                  | 2.0        | 7.0               | 3                |
| [Gd <sub>102</sub> Ni <sub>36</sub> ]                                  | 41.30                                                  | 2.0        | 7.0               | 4                |
| [Gd <sub>52</sub> Ni <sub>56</sub> ]                                   | 40.10                                                  | 2.0        | 7.0               | 5                |
| [Gd <sub>42</sub> Ni <sub>10</sub> ]                                   | 38.20                                                  | 2.0        | 7.0               | 6                |
| <b>[Gd<sub>20</sub>Ni<sub>21</sub>(MoO<sub>4</sub>)<sub>1.5</sub>]</b> | <b>37.83</b>                                           | <b>3.0</b> | <b>7.0</b>        | <b>This work</b> |
| [Gd <sub>18</sub> Co <sub>7</sub> ]                                    | 36.90                                                  | 2.0        | 7.0               | 7                |
| [Gd <sub>36</sub> Ni <sub>12</sub> ]                                   | 36.30                                                  | 3.0        | 7.0               | 8                |
| [Gd <sub>40</sub> Ni <sub>44</sub> ]                                   | 36.05                                                  | 3.0        | 7.0               | 9                |
| [Gd <sub>18</sub> Ni <sub>24</sub> ]                                   | 35.30                                                  | 3.0        | 3.0               | 10               |
| [Gd <sub>12</sub> Mo <sub>4</sub> ]                                    | 35.30                                                  | 3.0        | 7.0               | 11               |
| [Gd <sub>20</sub> Ni <sub>21</sub> ]                                   | 34.80                                                  | 3.0        | 7.0               | 12               |
| [Gd <sub>2</sub> Ni <sub>2</sub> ]                                     | 34.40                                                  | 4.5        | 7.0               | 13               |
| [Gd <sub>6</sub> Mn <sub>4</sub> ]                                     | 33.70                                                  | 3.0        | 7.0               | 14               |
| [Gd <sub>10</sub> Co <sub>4</sub> ]                                    | 32.60                                                  | 2.0        | 7.0               | 15               |
| [Gd <sub>6</sub> Ni <sub>6</sub> ]                                     | 32.00                                                  | 3.0        | 7.0               | 16               |
| [Gd <sub>4</sub> Cu <sub>5</sub> ]                                     | 31.00                                                  | 3.0        | 9.0               | 17               |

## References

- 1 H. J. Lun, L. Xu, X. J. Kong, L. S. Long and L. S. Zheng, *Inorg. Chem.*, 2021, **60**, 10079-10083.
- 2 W. P. Chen, P. Q. Liao, Y. Yu, Z. Zheng, X. M. Chen and Y. Z. Zheng, *Angew. Chem., Int. Ed.*, 2016, **55**, 9375-9379.
- 3 N. F. Li, Y. M. Han, J. N. Li, Q. Chen and Y. Xu, *Dalton Trans.*, 2022, **51**, 2669-2673.
- 4 W. P. Chen, P. Q. Liao, P. B. Jin, L. Zhang, B. K. Ling, S. C. Wang, Y. T. Chan, X. M. Chen and Y. Z. Zheng, *J. Am. Chem. Soc.*, 2020, **142**, 4663-4670.
- 5 D. P. Liu, X. P. Lin, H. Zhang, X. Y. Zheng, G. L. Zhuang, X. J. Kong, L. S. Long and L. S. Zheng, *Angew. Chem., Int. Ed.*, 2016, **55**, 4532-4536.
- 6 J. B. Peng, Q. C. Zhang, X. J. Kong, Y. Z. Zheng, Y. P. Ren, L. S. Long, R. B. Huang, L. S. Zheng and Z. Zheng, *J. Am. Chem. Soc.*, 2012, **134**, 3314-3317.
- 7 H. J. Lun, M. H. Du, D. H. Wang, X. J. Kong, L. S. Long and L. S. Zheng, *Inorg. Chem.*, 2020, **59**, 7900-7904.
- 8 J. B. Peng, Q. C. Zhang, X. J. Kong, Y. P. Ren, L. S. Long, R. B. Huang, L. S. Zheng and Z. Zheng, *Angew. Chem., Int. Ed.*, 2011, **50**, 10649-10652.
- 9 N. F. Li, Q. F. Lin, X. M. Luo, J. P. Cao and Y. Xu, *Inorg. Chem.*, 2019, **58**, 10883-10889.
- 10 N. F. Li, Q. F. Lin, Y. M. Han, Z. Y. Du and Y. Xu, *Chin. Chem. Lett.*, 2021, **32**, 3803-3806.
- 11 Y. Zheng, Q. C. Zhang, L. S. Long, R. B. Huang, A. Muller, J. Schnack, L. S. Zheng and Z. Zheng, *Chem. Commun.*, 2013, **49**, 36-38.
- 12 W. P. Chen, J. Singleton, L. Qin, A. Camon, L. Engelhardt, F. Luis, R. E. P. Winpenny and Y. Z. Zheng, *Nat. Commun.*, 2018, **9**, 1-6.
- 13 P. Wang, S. Shannigrahi, N. L. Yakovlev and T. S. Hor, *Chem. Asian J.*, 2013, **8**, 2943-2946.
- 14 Y. Z. Zheng, E. M. Pineda, M. Helliwell and R. E. P. Winpenny, *Chem. Eur. J.*, 2012, **18**, 4161-4165.
- 15 E. Moreno Pineda, F. Tuna, R. G. Pritchard, A. C. Regan, R. E. Winpenny, E. J. McInnes and Y. Z. Zheng, *Chem. Commun.*, 2013, **49**, 3522-3524.
- 16 E. M. Pineda, F. Tuna, Y. Z. Zheng, R. E. Winpenny and E. J. McInnes, *Inorg. Chem.*, 2013, **52**, 13702-13707.
- 17 T. Rajeshkumar, H. V. Annadata, M. Evangelisti, S. K. Langley, N. F. Chilton, K. S. Murray and G. Rajaraman, *Inorg. Chem.*, 2015, **54**, 1661-1670.
